# Supplementary material for: Redox-responsive core cross-linked micelles based on cypate and cisplatin prodrugs-conjugated block copolymers for synergistic photothermal–chemotherapy of cancer
Source: Royal Society of Chemistry journal article supplement (doi:10.1039/c4py00064a), 2014-01-01
Supplement: c4py00064a1.pdf [file c4py00064a1.pdf]

**Redox-responsive core cross-linked micelles based on cypate and  
cisplatin prodrugs-conjugated block copolymers for synergistic  
photothermal-chemotherapy of cancer**

Yu Han,<sup>a</sup> Junjie Li,<sup>a</sup> Minghui Zan,<sup>b</sup> Shizhong Luo,<sup>b</sup> Zhishen Ge<sup>\*a</sup> and Shiyong Liu<sup>a</sup>

<sup>a</sup> *CAS Key Laboratory of Soft Matter Chemistry, Department of Polymer Science and Engineering, University of Science and Technology of China, Hefei, Anhui 230026, China*

<sup>b</sup> *Key Laboratory of Functional Molecular Solids, Ministry of Education, Anhui Key Laboratory of Molecule-based Materials, College of Chemistry and Materials Science, Anhui Normal University, Wuhu, Anhui, P. R. China.*

\*To whom correspondence should be addressed: E-mail: [gez@ustc.edu.cn](mailto:gez@ustc.edu.cn), Tel:+81-551-63603670;

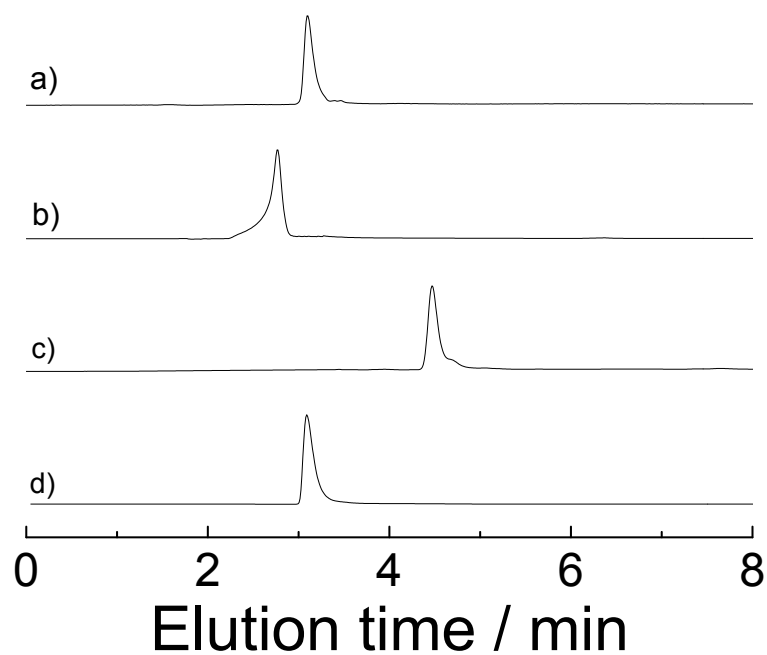

**Fig. S1** RP-HPLC traces recorded for a) cisplatin, b) *c,c,t*-[Pt(NH<sub>3</sub>)<sub>2</sub>Cl<sub>2</sub>(OH)(O<sub>2</sub>CCH<sub>2</sub>CH<sub>2</sub>CO<sub>2</sub>H)], c) *c,c,t*-[Pt(NH<sub>3</sub>)<sub>2</sub>Cl<sub>2</sub>(OH)(O<sub>2</sub>CCH<sub>2</sub>CH<sub>2</sub>CONHCH<sub>2</sub>C≡CH)], and d) *c,c,t*-[Pt(NH<sub>3</sub>)<sub>2</sub>Cl<sub>2</sub>(OH)(O<sub>2</sub>CCH<sub>2</sub>CH<sub>2</sub>CONHCH<sub>2</sub>C≡CH)] upon treating with 10 mM DTT for 1 h. The mobile phase was 80/20 methanol and water at a flow rate of 1.0 mL/min.

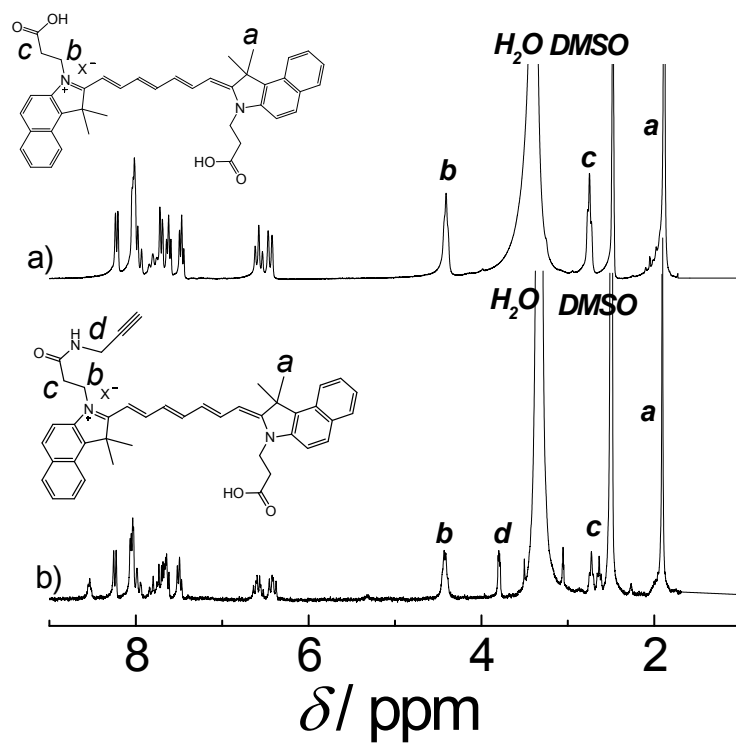

**Fig. S2**  $^1\text{H}$  NMR spectra recorded for cypate and *alkynyl*-cypate in  $\text{DMSO-}d_6$ .

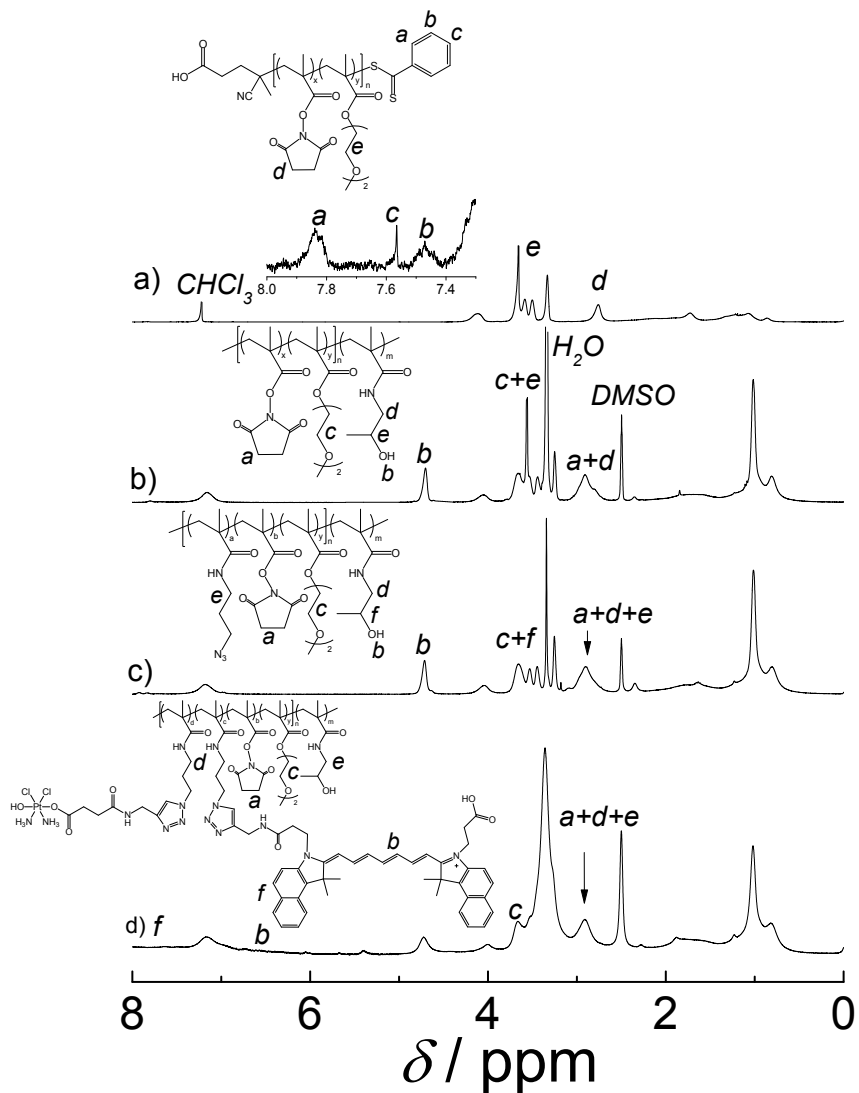

**Fig. S3**  $^1\text{H}$  NMR spectra recorded for P(MEO<sub>2</sub>MA-co-MASI) macroRAFT agent in  $\text{CDCl}_3$ , P(MEO<sub>2</sub>MA-co-MASI)-*b*-PHPMA block copolymer, P(MEO<sub>2</sub>MA-co-MASI-co-AzPMA)-*b*-PHPMA, and Pt(IV) complex and cypate-conjugated block copolymer, (Pt-Cy-PMEO<sub>2</sub>MA-co-PMASI)-*b*-PHPMA in DMSO-*d*<sub>6</sub>.

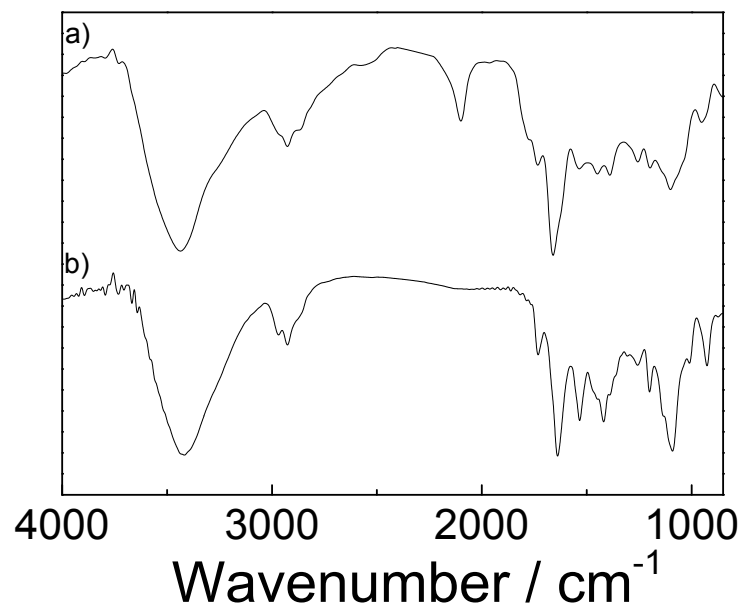

**Fig. S4** FT-IR spectra recorded for a) P(MEO<sub>2</sub>MA-*co*-MASI-*co*-AzPMA)-*b*-PHPMA block copolymer and b) (Pt-Cy-PMEO<sub>2</sub>MA-*co*-PMASI)-*b*-PHPMA block copolymer.

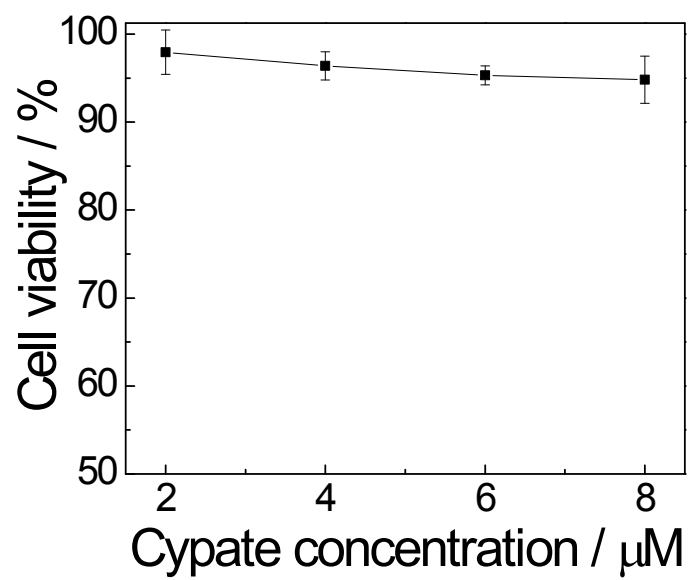

**Fig. S5** Cell viability of A549R cells after incubation with P(Cy<sub>21</sub>-MEO<sub>2</sub>MA<sub>67</sub>)-*b*-PHPMA<sub>148</sub> CCL micelles containing various cypate moiety concentrations.

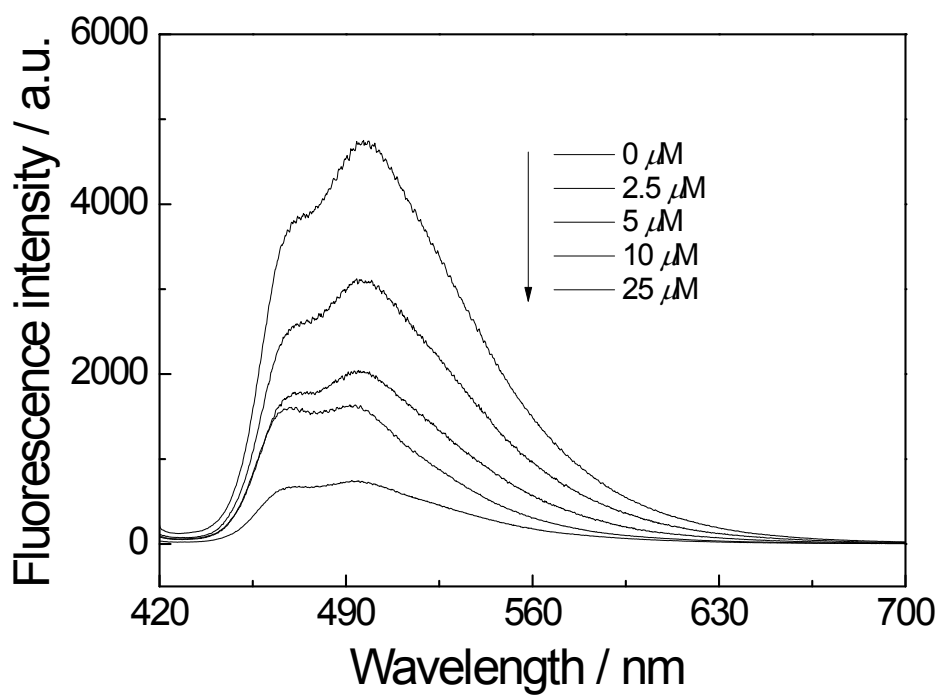

**Fig. S6** Fluorescence intensity of DPBF in aqueous solution (15 μM) in the presence of P(Pt<sub>14</sub>-Cy<sub>7</sub>-MEO<sub>2</sub>MA<sub>67</sub>)-*b*-PHPMA<sub>148</sub> CCL micelles with varying concentrations under an 805 nm NIR laser irradiation at a power density of 1 W/cm<sup>2</sup> for 3 min. The concentrations of cybate moieties are 0, 2.5, 5, 10, and 25 μM, respectively.
